# 1 **Unstable periodic orbits are faithful biomarker for the onset of epileptic seizure**

2

3

4 Mayukha Pal<sup>1</sup>, Sree Bhattacharjee<sup>2,3</sup>, Prasanta K. Panigrahi<sup>3,\$</sup>

5 <sup>1</sup>ABB Ability Innovation Center, Asea Brown Boveri Company, Hyderabad 500084, India.

6 <sup>2</sup>School of Natural Sciences, Central University of Jharkhand, Cheri-Manatu, Kamre, Ranchi  
7 835222, India

8 <sup>3</sup>Indian Institute of Science Education and Research Kolkata, Mohanpur 741246, India.

9

10

11 <sup>\$</sup>Corresponding author:

12

13 Dr. Prasanta K. Panigrahi

14 Professor, Department of Physical Sciences

15 Indian Institute of Science Education and Research Kolkata,

16 Mohanpur-741 246, West Bengal, India.

17 Tele: +91-9748918201

18 Email: pprasanta@iiserkol.ac.in

19

## 20 **Abstract**

21 EEG signals of healthy individuals and epileptic patients, when treated as time series of evolving  
22 dynamical systems, are found to display characteristic differences in the behavior of the unstable  
23 periodic orbits (UPO), marking the transition from regular periodic variations to self-similar  
24 dynamics. The UPO, manifesting as broad resonances in the Fourier power spectra, are quite  
25 prominent in their presence in the normal signals and are either absent or considerably weakened  
26 with a shift towards lower frequency in the epileptic condition. The weighted average and visibility  
27 power computed for the UPO region are found to distinguish epileptic seizure from healthy  
28 individuals' EEG. Remarkably, the unstable periodic motion for healthy ones is well described by  
29 damped harmonic motion, the orbits displaying smooth dynamics. In contrast, the epileptic cases  
30 show bi-stability and piecewise linear motion for the larger orbits, exhibiting large sudden jumps  
31 in the 'velocity' (referred to the rate of change of the EEG potentials), characteristically different  
32 from the healthy cases, highlighting the efficacy of the UPO as biomarkers. For both the regions,  
33 8-14Hz UPO and 40-45Hz resonance, we used data driven analysis to derive the system dynamics  
34 in terms of sinusoidal functions, which reveal the presence of higher harmonics, confirming  
35 nonlinearity of the underlying system and leading to quantification of the discernible differences  
36 between the healthy and epileptic patients. The gamma wave region in the 40-45Hz range,  
37 connecting the conscious and the unconscious states of the brain, reveals well-structured coherence  
38 phenomena, in addition to the prominent resonance, which potentially can be used as a biomarker  
39 for the epileptic seizure. The wavelet scalogram analysis for both UPO and 40-45Hz region also  
40 clearly differentiates the healthy condition from epileptic seizure, confirming the above dynamical

1 picture, depicting the higher harmonic generation, and intermixing of different modes in these two  
2 regions of interest.

3

4 **Keywords:** EEG signal; Nonlinear dynamics; Unstable periodic orbits; Phase space plots; Seizure  
5 and its biomarker

6

## 7 **Significance**

8 Unstable periodic orbits are demonstrated as faithful biomarkers for detecting seizure, being  
9 prominently present in the Fourier power spectra of the EEG signals of the healthy individuals and  
10 either being absent or significantly suppressed for the epileptic cases, showing distinctly different  
11 behavior for the unstable orbits, in the two cases. A phase space study, with EEG potential and its  
12 rate of change as coordinate and corresponding velocity, clearly delineates the dynamics in healthy  
13 and diseased individuals, demonstrating the absence or weakening of UPO, that can be a reliable  
14 bio-signature for the epileptic seizure. The phase-space analysis in the gamma region also shows  
15 specific signatures in the form of coherent oscillations and higher harmonic generation, further  
16 confirmed through wavelet analysis.

17

## 18 **1. Introduction**

19

20 Complex dynamical systems in nature are often faithfully modelled by non-linear equations,  
21 characterized by stable and unstable periodic orbits, attractors, chaotic behavior, as well as bi-  
22 stability, owing their origin to nonlinearity. Human brain is a complex system consisting of  
23 billions of nerve cells (or neurons), which help transmit signals from the brain to the rest of the  
24 body [1-3]. A seizure is a paroxysmal alteration of neurologic function, arising from the excessive,  
25 hyper-synchronous discharge of neurons in the brain. Epilepsy is a serious condition of recurrent,  
26 unprovoked seizures. It has numerous causes, each reflecting certain underlying brain dysfunction  
27 [4]. Seizures can occur spontaneously as well as in a recurrent pattern, due to distorted neuronal  
28 interactions. Epilepsy, being a neurological dysfunction, significantly affects the entire nervous  
29 system due to this massive synchronous discharge of the brain cells [5]. Epileptic seizure causes  
30 loss of consciousness, sudden jerk movements, muscle spasms, fear, and anxiety, sometimes  
31 leading to the loss of life. It is a serious neuronal disorder, with about 1-2% of the global population  
32 affected by epilepsy, the most common neurological dysfunction. Epilepsy is not a single disease,  
33 but a collection of symptoms that can range from a brief lapse of awareness to prolonged  
34 convulsions, all caused by misfiring neurons in the brain. It can be brought on by illness or head  
35 trauma, although very often there is no clear precipitating event [6-7].

36

37 Electroencephalogram (EEG) recording is a key medical tool for studying the behavior of the  
38 seizure. It measures the electric potential of the brain and is capable of providing dynamical neural  
39 information, brain disorders, and cognitive processes, related to the brain state [8]. EEG is a non-  
40 invasive process and therefore allows the record to be taken for a long period of time for a precise

1 observation of the dynamic behavior of epileptic seizure [9-10]. Brain cells communicate via the  
2 electrical impulses through a large number of neurons; its spatiotemporal behavior can be observed  
3 by placing about 20 small flat metal discs or electrodes attached to the scalp through wires. This  
4 test helps to diagnose medical conditions like epilepsy, head injuries, seizure, brain tumors, and  
5 other brain related problems. Sudden seizures due to epilepsy can lead to fatal falls for unattended  
6 patients, underscoring the importance of predicting seizure occurrence [11-14]. Difficulty in  
7 prediction arises from the lack of reliable biomarkers for detecting the onset of the epileptic seizure  
8 [15-17].

9  
10 The EEG signals have relatively low amplitude levels, from which brain rhythms in the form of  
11 waves are well discernible. Commonly observed rhythms include alpha, beta, gamma and theta  
12 waves. Alpha waves fall within the range of 4-8 Hz and thus are considered as slow rhythms. These  
13 are normal in children up to 13 years and are found in sleeping or in the rest state of adults. Beta  
14 waves spike during emotional responses to frustrating events, lying in the range of 13-30 Hz and  
15 can be detected on both sides of the head. It is most evident in the frontal domain and gets reduced  
16 in case of cortical damage. It can occur during rapid eye movement (REM) sleep. Gamma waves  
17 lie within the range of 30-100 Hz and are considered as fast rhythms. These are present during  
18 mixed sensory processing such as combination of hearing and seeing. This connects the conscious  
19 state to the unconscious state of the brain and is often referred to as genius waves. A reduction in  
20 gamma wave activity might be associated with cognitive decline, especially when compared to  
21 theta wave activity levels [18-20].

22  
23 It has been observed that for detecting the epileptic seizure from the EEG data of normal and  
24 epileptic subjects, various schemes based on variational mode decomposition [21], wavelet and  
25 time frequency analysis [22-25], random matrix theory [26], fractal based analysis [27-29] and  
26 neural network and deep learning [30-33] analysis can be potentially used. Here, we report unstable  
27 periodic orbits (UPO) as a seizure biomarker from nonlinear dynamics-based analysis. We  
28 characterize the complex behavior of this dynamical system, taking recourse to the classical  
29 phase-space approach, routinely used in the analysis of electrical circuits, represented by damped  
30 driven oscillators. For this purpose, the potential is identified as displacement coordinate with its  
31 variation as velocity, whose phase space behavior brings out the characteristic differences. The  
32 much-used Fourier spectrum reveals the periodic waves as sharp peaks and self-similar behavior  
33 through its scale free power law behavior. These two regimes in the dynamics are often separated  
34 by unstable periodic orbits, which appear as broad resonances in the Fourier domain [34].  
35 Remarkably, it is found that the healthy individuals' EEG signals display well marked UPO,  
36 whereas these are absent or significantly reduced in case of the epileptic patients during seizure,  
37 signifying its use as a biomarker for the onset of the epileptic seizure. UPO can be regarded as a  
38 local signature in the frequency domain for the onset of chaos. The chaotic systems consist of an  
39 infinite set of UPO, the trajectory of the system comes occasionally close to a relatively low  
40 periodic orbit, resulting in the system to behave visibly in an almost periodic manner for a short

1 time [35-37]. UPO are the "frame" of any dynamical system, which can discern the behavior of a  
2 given system. In a chaotic system, they can also take the form of an attractor, appearing like a  
3 Lissajous figure. UPO are very sensitive to small perturbations in the environment, as it is located  
4 between the boundary of regular and self-similar behavior, characterized respectively by the low-  
5 frequency periodic dynamics and higher-frequency chaotic motion. It manifests as a broad  
6 resonance, with substantial increase in power in a small range of frequencies in the Fourier domain  
7 [38]. Dynamical systems generically possess UPO regions, representing higher frequency periodic  
8 motion, that are extremely sensitive to perturbations, making them ideal for the investigation of  
9 the characteristically different behavior of the healthy and diseased conditions.

10  
11 We have observed occurrences of coherent dynamics and also broad UPO, manifesting as  
12 resonances, both of which display characteristic differences in normal and epileptic conditions that  
13 can act as a biomarker for the onset of epileptic seizure. Focusing on the 40-45Hz gamma region  
14 in the Fourier domain, one can identify the differences in the neocortical oscillations, involving  
15 most of the cognitive functions in healthy and disease conditions. In the following section 2, the  
16 data description is presented along with our analysis methods. Section 3 discusses the results and  
17 highlights the UPO biomarkers, with their characteristic differences. Section 4 concludes the study  
18 with our inferences and possible future investigations.

## 19 20 **2. Materials and Methods**

21  
22 This section is devoted to the details of the data that have been used for the subsequent analysis.  
23 Methods like the Fourier power spectrum analysis, unstable periodic orbit, phase space plots, and  
24 data driven governing system equation derivation are used in this analysis. The measured data is  
25 from the extra cranial and intracranial EEG recordings and are used for clinical and research  
26 purposes. The data for this work has been taken from the publicly available data of the Department  
27 of Clinical Epileptology, University Hospital of Bonn, Germany [39]. The time series data consists  
28 of five sets of recordings A, B, C, D, and E, each having 100 channels of 23.6 sec duration,  
29 consisting of 4097 recordings. The first and second set measures the extra cranial data of a healthy  
30 volunteer in their eyes open and close. The third and fourth set are composed of intracranial  
31 recording from hippocampal formation of the opposite hemisphere of the brain of patients and  
32 from within the epileptogenic zone during the interictal period, respectively. The data in the last  
33 set (E) was recorded during seizure activity (ictal periods) using depth electrodes placed within  
34 the epileptogenic zone of the epileptic patients' brain. The sampling frequency of each data is  
35 173.61Hz. Analysis has been done by subtracting the mean from each single channel initially for  
36 each different set and then normalizing it by factoring the standard deviation.

37  
38 For our analysis, we primarily focused on Set B, the healthy subjects in eye closed condition and  
39 Set E, the epilepsy patients during seizure. Analysis for other datasets have been provided in the  
40 supplementary material of this manuscript. The Fourier power spectrum is the assignment of power

1 into the frequency components of the signal. It is important in signal processing studies, as it  
 2 transparently brings out the nature of the different constituents of the time series. The Fourier  
 3 power spectrum clearly identifies the unstable periodic orbits as broad resonances, as will be  
 4 shown in our following analysis in the region between 8-14Hz, for the healthy cases. Here the  
 5 UPO region 8-14 Hz has been taken for the analysis as it possesses the biomarker characteristics  
 6 because of its sensitive behavior to minute perturbations [34]. The 40-45Hz region has also been  
 7 taken for consideration as it shows the transition region of higher and lower modulation kind of  
 8 behavior displaying coherence, as well as a broad resonance.

| Data Call Type | Subject's State                               | Electrode Type | Electrode Placement                                                 |
|----------------|-----------------------------------------------|----------------|---------------------------------------------------------------------|
| A              | Healthy person with eyes open                 | Scalp          | International 20 electrode system                                   |
| B              | Healthy person with eyes closed               | Scalp          | International 20 electrode system                                   |
| C              | Epilepsy patient during seizure free interval | Intracranial   | 20 electrodes from hippocampal formation of the opposite hemisphere |
| D              | Epilepsy patient during seizure free interval | Intracranial   | 20 electrodes within the epileptogenic zone                         |
| E              | Epilepsy patient during seizure               | Intracranial   | 20 electrodes from patients during the seizure activity             |

10  
 11 **Table-1:** EEG data in brief

12  
 13 In our analysis, the phase space trajectories have been generated by plotting the potential values  
 14 from the recording in the x-axis and the corresponding derivatives in the y-axis. Phase space  
 15 plotting is a novel way for the study of the EEG data, with the trajectories revealing periodic  
 16 motion, UPO and sudden changes quite transparently [40]. From the existence of distinct  
 17 oscillatory patterns of the recorded EEG data, the different brain states can be clearly distinguished  
 18 [19-20]. Akin to the observations in well studied electrical potential generating circuits, harmonic  
 19 motion characterized by the following ordinary differential equation, is clearly discernible in  
 20 phase-space dynamics:

$$x'' = -\omega^2 x, \text{ where } x'' = \frac{d^2x}{dt^2} \text{ and } \omega^2 = k/m \dots (1)$$

21  
 22 The above is augmented with damping and driving terms, as also non-linear anharmonic terms for  
 23 appropriate descriptions of diverse physical systems. Our analysis shows some of the trajectories,  
 24 after following simple harmonic motion, tend to show nonlinear motion like bi-stability and  
 25 unbounded motion [41]. To ascertain the nature of the nonlinearity affecting the phase space  
 26 trajectories, we have computed the system behavior in terms of sinusoidal functions and higher  
 27 harmonics in a data driven approach, which clearly reveals significant presence of higher  
 28 harmonics, indicative of nonlinearity in the dynamics. One can characterize the different brain

1 waves, alpha, beta, gamma, delta by the occurrence of particular oscillatory patterns from the EEG  
2 recordings in different frequency bands. For a time-frequency localization of the bifurcation  
3 behavior, as well as intermixing of different modes, we made use of the continuous Morlet wavelet  
4 to bring out the transient time varying dynamics in those specific regions of interest: 8-14Hz and  
5 40-45Hz. The oscillatory behavior is analogous to that of harmonic oscillator patterns, originating  
6 from Hooke's law.

$$7 \quad F = -kx \dots (2)$$

8 where k is the spring constant, F is the force acting on the oscillator, with x in the form,

$$9 \quad x(t) = A \cos(\omega t + \varphi) \dots (3),$$

10 the amplitude A is controlled by the energy of the oscillations,  $E = \frac{1}{2}kA^2$  .

11 In physical scenarios, the dynamical behaviors are of two types namely, wave dynamics and  
12 particle dynamics. The classical particle dynamics is described by Newtonian mechanics in terms  
13 of phase space by considering the coordinate and their instantaneous changes. The wave behavior  
14 manifests through coherence effects leading to collapse and revival [19-20]. In the present case,  
15 this may arise due to synchronization amongst the neuronal firings. The nonlinear time series from  
16 the EEG recordings, when treated as a general dynamical system, can be represented by a general  
17 equation of the type.

$$18 \quad \frac{dx(t)}{dt} = f(x(t)) \dots (4)$$

19 As EEG is recorded during synchronous discharge of electrical activity from the human brain, it  
20 is characterized by large fluctuations. The Weierstrass function,

$$21 \quad f(x) = \sum_{n=0}^{\infty} a^n \cos(b^n \pi x) \dots (5)$$

22 with  $0 < a < 1$  , b a positive odd integer, is a real valued function known for its continuity  
23 everywhere and also is an example of fractal curve, that has been effectively used to characterize  
24 biomedical waveforms and complex signals. Fractal geometry has manifested in diverse biological  
25 signals and can be potentially useful for the study of the epileptic seizure [28] and can help one to  
26 classify and describe the signal at all scales. The nonlinear time series-based investigations have  
27 shown positive results in detection and identification of epileptic seizure from EEG recordings.  
28 Some of these nonlinear parameters are: Lyapunov exponent [31-32], correlation dimension [31],  
29 fractional dimension parameter [28] and approximate entropy (ApEn) [7]. Empirical mode  
30 decomposition (EMD) is also a promising method, which helps to develop feature space using  
31 ellipse area parameters of two intrinsic mode functions as it is suitable in processing a non-linear  
32 time series. The ellipse area parameters of first and second intrinsic mode functions (IMFs) have  
33 provided better classification accuracy for classifying ictal and seizure-free EEG signals. EMD  
34 method-based decomposition does not require any conditions about the stationarity and linearity  
35 of the signal [27]. For identifying a reliable biomarker for the onset of the epileptic seizure,  
36 complex behavior of the nonlinear series has been characterized by state of the motion and  
37 observed unstable periodic orbits:

$$P \subset \mathbb{R}^N, N \in \mathbb{N} \text{ and } x = x^1, x^2, \dots x^N \in P, n \in \mathbb{Z} \dots (6)$$

Here  $P$  is any number and  $x$  is the set of the measurement of a system.

$$M: P \rightarrow P, x_{n+1} = M(x_n) \dots (7)$$

Equation (7) can be, generically, considered as the equation of motion of a dynamical system, where  $x$  is the set of measurements of the system, and  $M$  is the manifold of the dynamical system.

To understand the dynamics of the phase space structure of the UPO and 40-45Hz region and further corroborate our understanding with the dynamical system's motion, we make use of a data driven governing system equation derivation approach to derive the system equation. The data used for phase space displacement and velocity plots for the UPO and 40-45 Hz regions are considered for this analysis. Deriving governing equations identifies the physical systems' linear and nonlinear behavior and hence aids in developing models that can be generalized to predict the future state of the system, the previously unseen behaviors. This is useful in many systems of interest across disciplines where underlying governing equations remain unknown even though a large amount of data is available. It is well known that most physical systems define their dynamics with only a few relevant terms, hence the governing system equations are sparse in a high-dimensional nonlinear function space. So, with use of sparse regression [42-44] and compressed sensing [45-48] combined approach, the dynamical system equation is discovered. The novel approach of combining sparsity methods in dynamical systems brings out system information from data. Here we employed SINDy model [49-51] that considers data  $x(t) \in \mathbb{R}^n$  to discover a best fit dynamical system [52], derived from sparse regression represented by a few possible terms in the form of:

$$\frac{d}{dt} x(t) = f(x(t)) \dots (8)$$

Here the state of the system  $x$  evolves with time  $t$  with the dynamics being constrained by the function  $f$ . To determine the function  $f$  from the data, its derivative is either measured or numerically approximated and stacked to form data matrices.

$$X = [x_1 \ x_2 \ x_3 \ \dots \ x_m]^T \text{ and } \dot{X} = [\dot{x}_1 \ \dot{x}_2 \ \dot{x}_3 \ \dots \ \dot{x}_m]^T \quad X, \dot{X} \in \mathbb{R}^{m \times n} \dots (9)$$

Next, we construct a library consisting of  $p$  candidate nonlinear functions from columns of  $X$  where  $\Theta_j$  is a candidate model term and  $m \gg p$ .

$$\Theta(X) = [\Theta_1(X) \ \Theta_2(X) \ \dots \ \Theta_p(X)] \in \mathbb{R}^{m \times p} \dots (10)$$

The choice of basis function  $\Theta(X)$  may consist of constant, polynomial, Fourier and trigonometric terms. Each column of  $\Theta(X)$  is a candidate function for the right-hand side of Eq. 8. As polynomials are elements of many canonical models hence are most used.

$$\dot{X} = \Theta(X) \Xi, \text{ where } \Xi = (\xi_1 \ \xi_2 \ \xi_3 \ \dots \ \xi_n) \in \mathbb{R}^{p \times n} \dots (11)$$

Here matrix  $\Xi$  is set of the coefficients which gets the active terms from  $\Theta(X)$  in the dynamics  $f$ . With the use of sparse regression in solving  $\Xi$ , each obtained  $\xi_j$  is sparse with only a few columns selected from  $\Theta(X)$ .

### 1 3. Results and discussion

2

3 The normalized, cumulative sum time series data was considered in Fourier power spectral  
4 analysis where the Fourier power is plotted as a function of frequency, in a log-log scale to  
5 distinguish the domains of high frequency self-similar behavior from the low frequency periodic  
6 ones, with the UPO marking the boundary of these two domains. Comparing the behavior of Set  
7 B and Set E, the distinct differences can be ascertained, between the healthy individuals and  
8 epileptic patients. Fig 1 represents the Fourier power spectrum (FPS) of the Set B and E, showing  
9 the UPO range around 8-14Hz section, centered at 10 Hz. These plots show clear indication that  
10 UPO can be considered as a biomarker as here it can be observed that in Set B there is a clear UPO  
11 peak whereas it is prominently reduced in case of Set E. Due to the sensitivity of UPO to minor  
12 perturbations, it can be considered as a bio-alarm of the onset of the epileptic seizure. In the  
13 Supplementary material of the manuscript, we have shown the FPS for Set A. The UPO peaks of  
14 Sets A and B are similar, though Set A has recordings with the eyes open, where the role of external  
15 stimuli can be important, in contrast to the case of eyes closed, where the healthy volunteer is in a  
16 restful state of cognition. Generally, white noise in signal analysis is referred to as a signal with  
17 equal intensity at different values of frequencies, resulting in a constant power spectral density. In  
18 Fig 1, it can be noticed that the white noise is more prominent in 1(b) than in 1(a), which shows  
19 the agitation occurred during the recordings as visible in the FPS analysis.

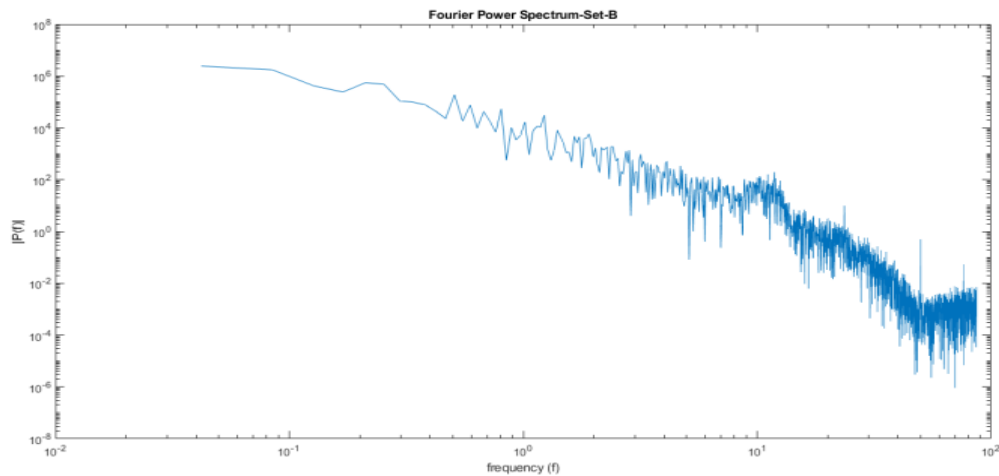

20

21

22 Fig.1(a)-Fourier power spectrum analysis of the healthy individual (Set B, eyes closed) showing a prominent UPO  
23 peak centered at 10Hz.



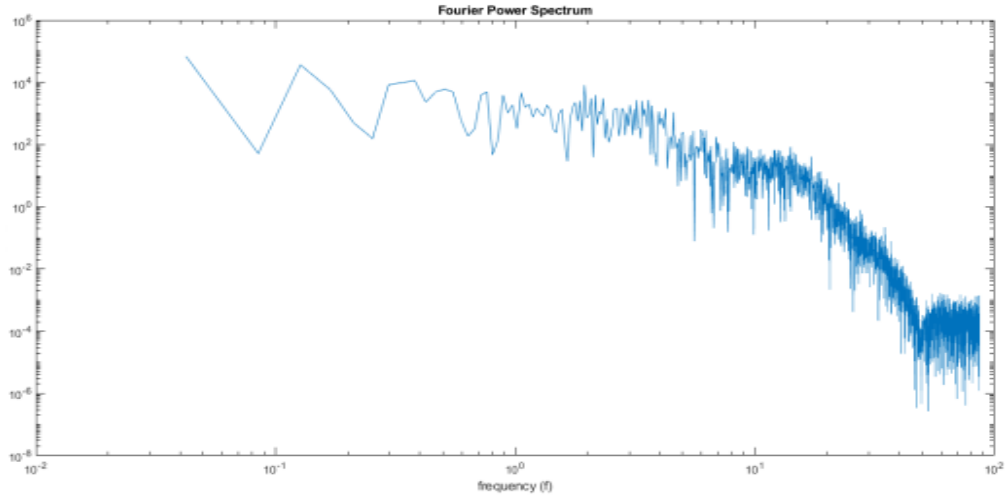

1  
2  
3 Fig.1(b)-Fourier power spectrum of the patient during seizure (Set E), a clear diminishing of the UPO peak can be  
4 observed.

5 **Fig 1:** Fourier Power Spectrum for Sets B & E.

6  
7 We observe dominant UPO regions with gradual increase in power centered around 10-11Hz for  
8 healthy subjects, finding diminished power for seizure during the 10-11Hz at ictal activities.  
9 Therefore, the quantification of UPO power is a potential biomarker for the seizure activity in  
10 epilepsy patients. The UPO region power for set E shows lower power, as compared to healthy  
11 subjects, with the power values being random unlike peaks for healthy cases, showing a  
12 distinguishing non-harmonic behavior of the EEG waves during seizure activity.

13

| Set B        |               |                    | Set E        |               |                    |
|--------------|---------------|--------------------|--------------|---------------|--------------------|
| Channel Name | Frequency (f) | Fourier Power (Py) | Channel Name | Frequency (f) | Fourier Power (Py) |
| O018         | 8             | 11.06              | S028         | 8             | 1.876              |
|              | 9             | 14.76              |              | 8.687         | 81.37              |
|              | 10            | 16.88              |              | 10            | 15.89              |
|              | 11.1          | 766                |              | 11            | 51.9               |
|              | 12            | 62.5               |              | 12            | 23.56              |
|              | 13            | 13.18              |              | 13            | 5.422              |
|              | 14            | 4.383              |              | 14            | 8.781              |

14  
15 **Table 2:** Sample Fourier Power data table for the UPO range of randomly selected channel of  
16 Set B (O018) and Set E (S028)

17  
18 To quantify the UPO power from the FPS for different frequencies from this segment of interest,  
19 we have tabulated various data points for both the analyzed datasets. Table 2 depicts the Fourier

1 power for the UPO region of one channel of set B and E to reveal the significant peak power  
2 differences. We computed weighted average power for the UPO region to quantify it by calculating  
3 the sum product between the frequency and power and then dividing it with the sum of the total  
4 frequency. Also, as an additional measure the visibility is computed by subtracting the average of  
5 the two neighboring points of the UPO range from the highest power peak value. It is observed  
6 from both plots in Fig 2, the quantitative measure of weighted average power and visibility power  
7 from the UPO region clearly distinguish healthy individuals from the patients during seizure,  
8 reaffirming UPO as potential biomarker. We randomly chose five channels for Set B and E for the  
9 representation purpose and verified the features of almost all channels showing a uniform  
10 characteristic from UPO. In Set B, all channels the highest peak power is observed at the middle  
11 i.e., in and around 11Hz of the UPO region (8-14Hz) with higher power value compared to Set E,  
12 where it is at either side of the extreme points of the UPO region with very small or diminishing  
13 power. Hence, a one-sided lobe type structure for UPO, with diminishing peaks is observed in case  
14 of the epileptic patients during seizure. Also, it is observed that, for both sets E and B, there is  
15 oscillatory behavior in the UPO region, both before and after the peak power. Generally, the UPO  
16 region from the Fourier power spectrum is detected through measuring the rate of change.

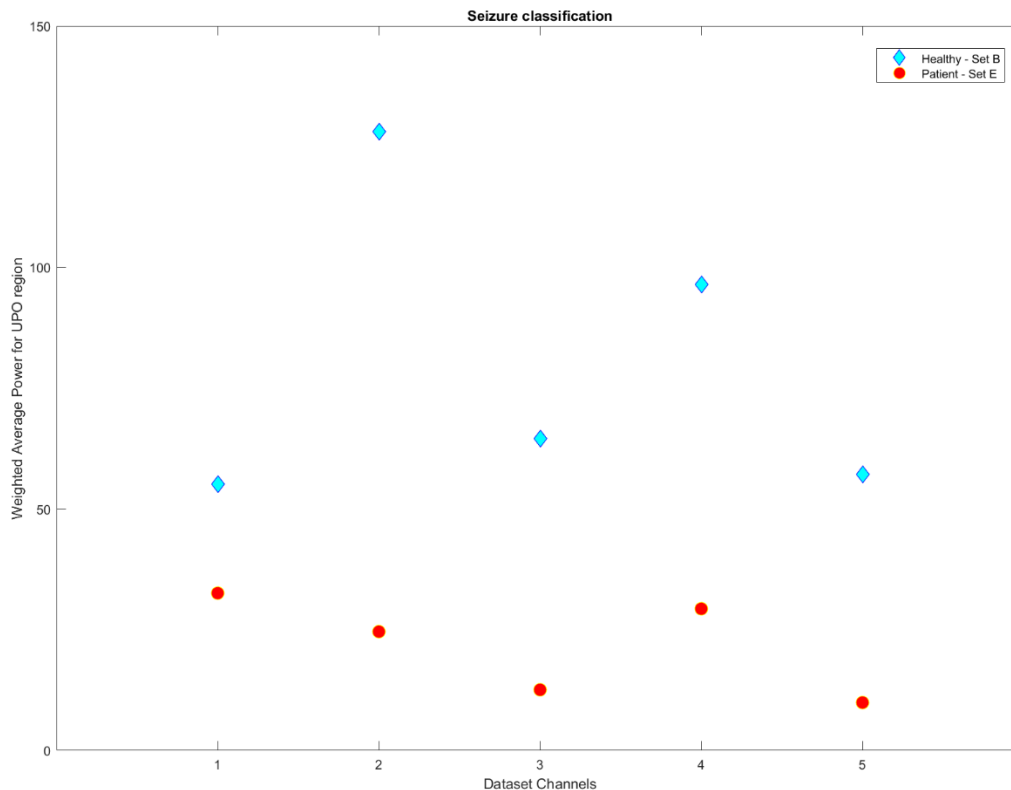

17  
18 Fig. 2(a)-Weighted average power for the UPO regions for randomly selected channels of healthy eye closed (set B)  
19 and a patient during seizure (set E) showing distinct classification for seizure.

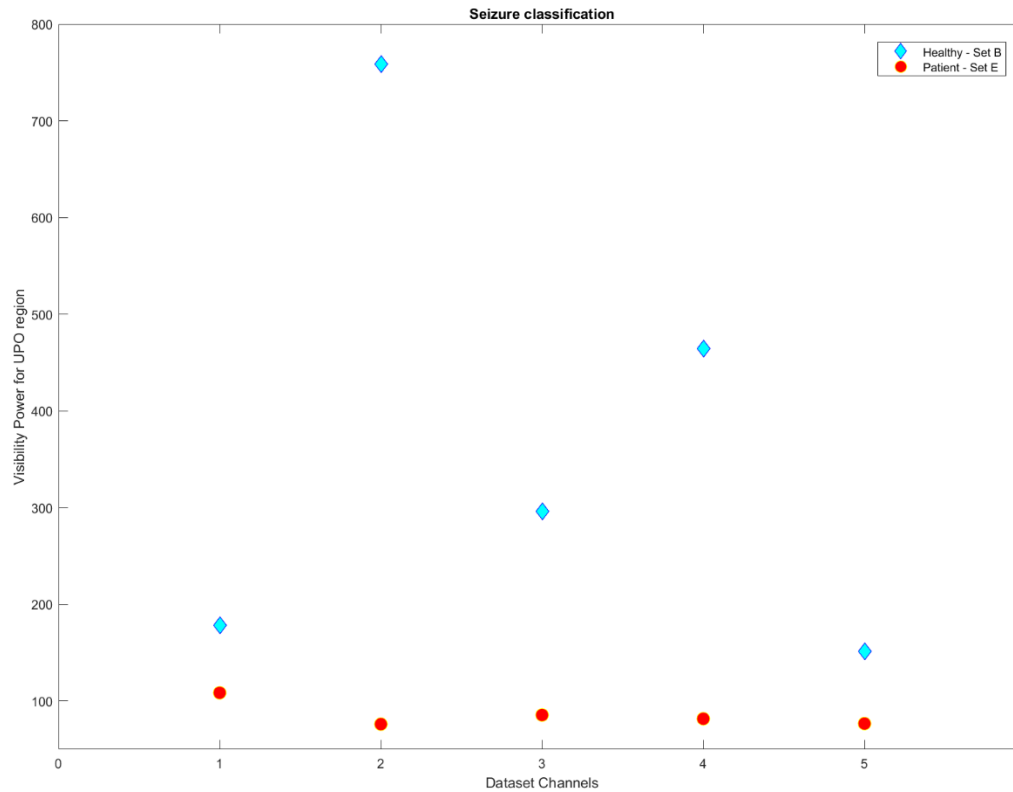

1  
2 Fig. 2(b)- Visibility power for UPO region for randomly selected channel of healthy eye closed (set B) and patient  
3 during seizure (set E) showing distinct classification for seizure.

4  
5 **Fig 2:** Weighted average and visibility power as quantifying parameter for UPO region to classify  
6 seizure.

7  
8 To understand the nonlinear distribution of power at the UPO region and the 40-45Hz region, we  
9 reconstructed the signal from the Fourier Power spectrum only for the UPO or 40-45Hz region.  
10 Then the reconstructed signal is used for 2D and 3D scalograms for visualization of UPO as a  
11 faithful seizure biomarker and 40-45Hz also has characteristic differences between healthy and  
12 seizure patients. Fig 3 and 4 reveal the differences for healthy and seizure patients.

13  
14 **2D Scalogram Plots:**

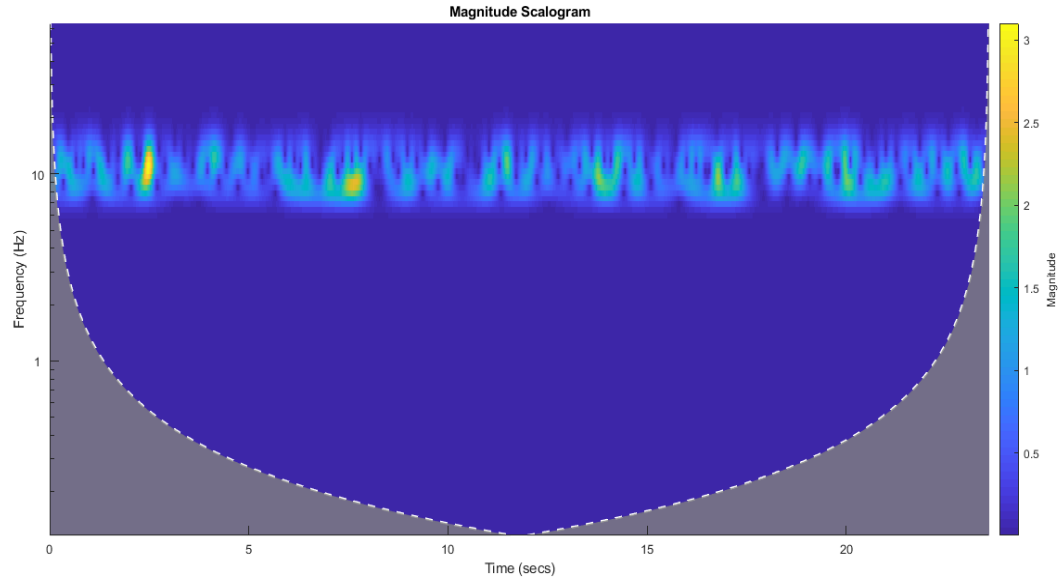

1  
2 Fig 3(a):2D Scalogram plot for the reconstructed UPO region of the healthy individual in eyes closed (for a sample  
3 channel) of higher power compared to patients during seizure.  
4

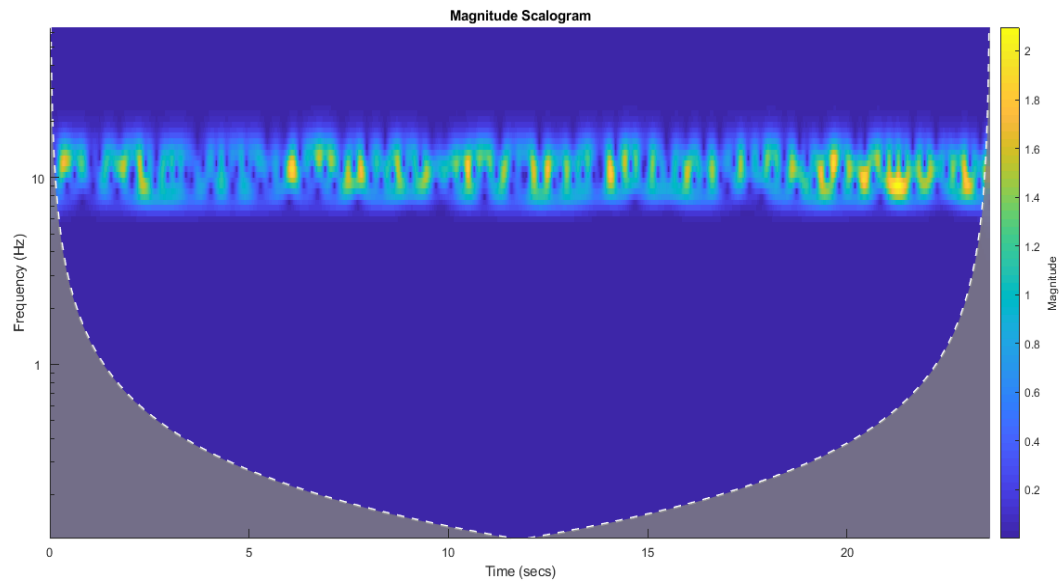

5  
6 Fig 3(b):2D Scalogram plot for the reconstructed UPO region of the Set E, recorded during the epileptic seizure  
7 shows a repetitive train of pulses (yellow colour) with equivalent power.  
8

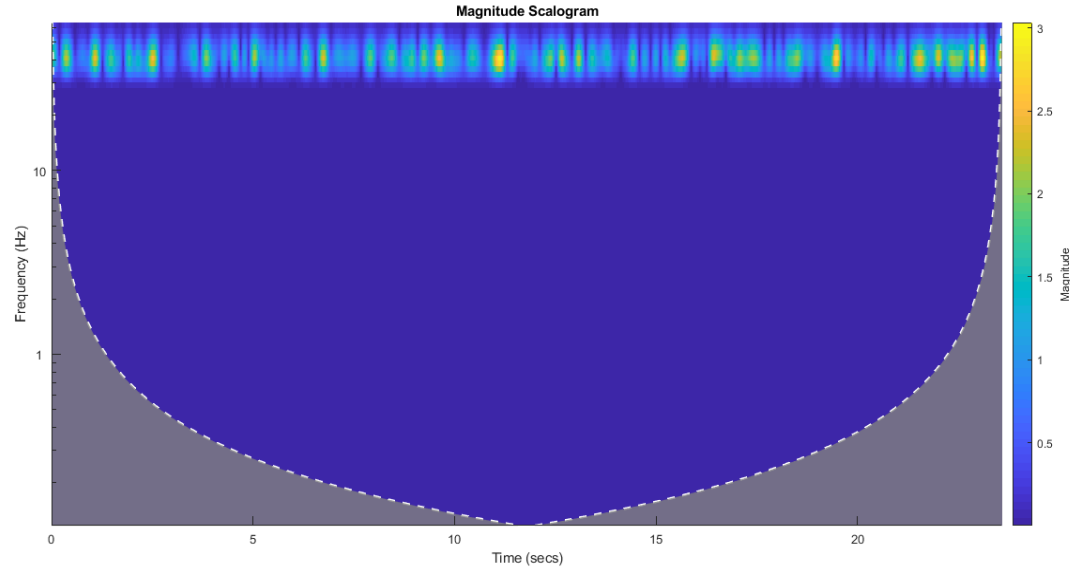

1  
2 Fig 3(c):2D Scalogram plot for the reconstructed 40-45Hz region of the healthy during closed eyes showing lower  
3 power compared to the patient during seizure.  
4  
5

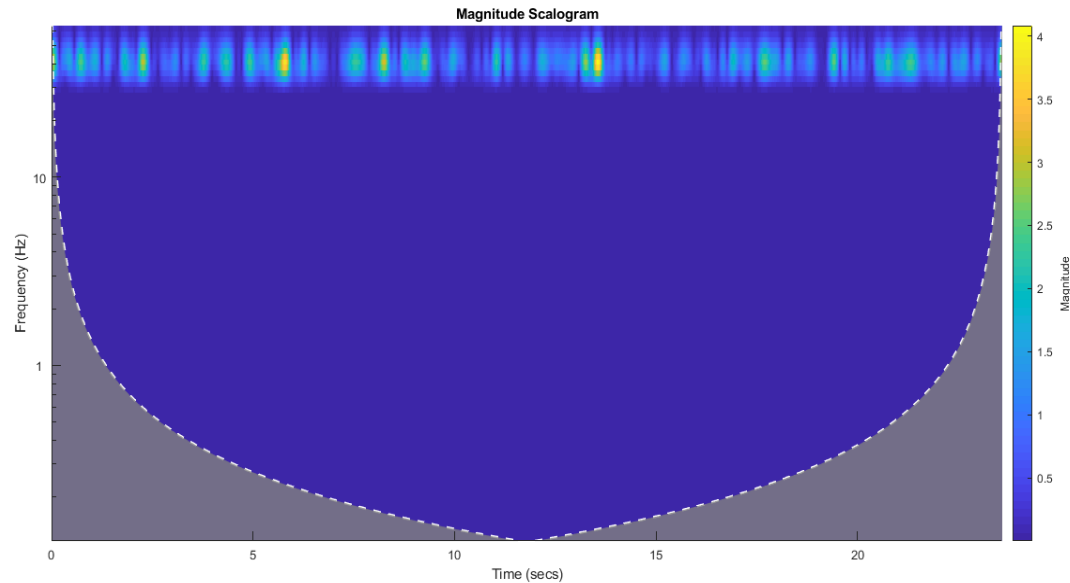

6  
7 Fig 3(d):2D Scalogram Plot for the reconstructed 40-45Hz region of the patient during seizure showing possible  
8 energy transfer phenomena as transition from conscious to unconscious brain characteristic as we found very less  
9 power trains like healthy subjects as in Fig 4c.  
10

11 **Fig 3:** 2D scalogram plot of the reconstructed UPO and 40-45Hz region for a randomly selected  
12 channel of the Sets B and E.  
13

14 **3D Scalogram Plots:**  
15

It is made available under a [CC-BY-NC-ND 4.0 International license](https://creativecommons.org/licenses/by-nc-nd/4.0/) .

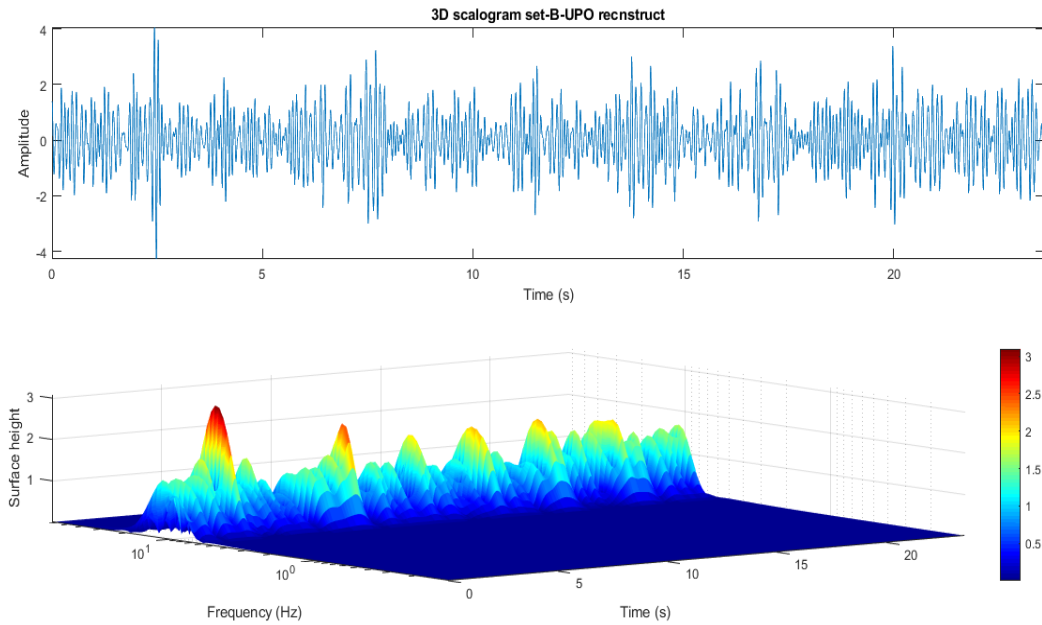

1  
2 Fig 4(a)- The 3D scalogram plot along with the reconstructed signal for the UPO region of the healthy subject eye  
3 open showing peak power initial recording time. Also the reconstructed signal for UPO region visibly resembling a  
4 music pattern.  
5

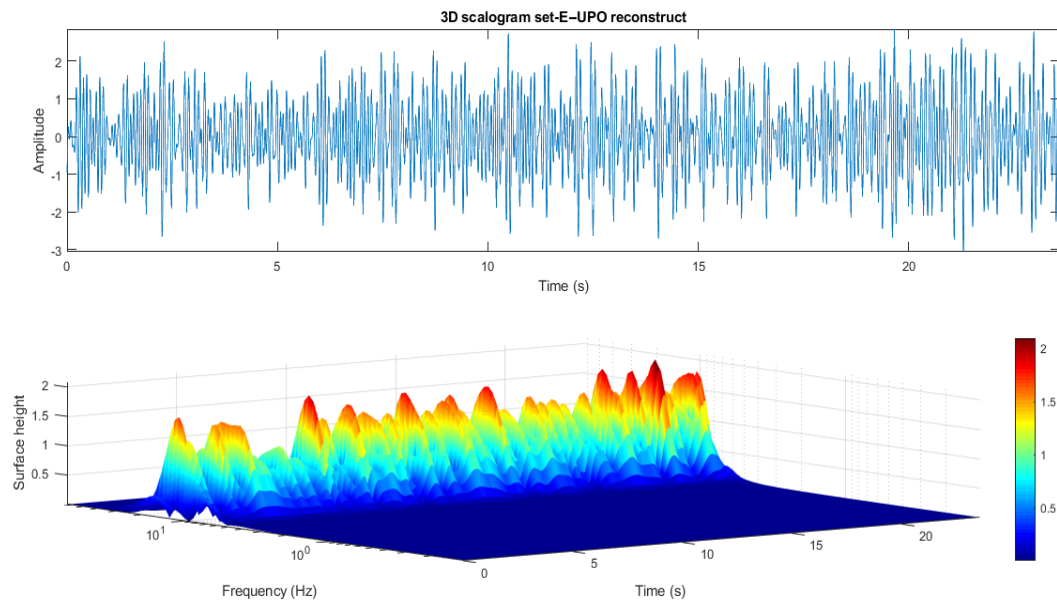

6  
7 Fig 4(b)- The 3D scalogram plot along with the reconstructed signal for the UPO region of the patient during seizure  
8 with consistent repetitive peak power across the time scale. The reconstructed signal for UPO region, showing loss  
9 of coherence.

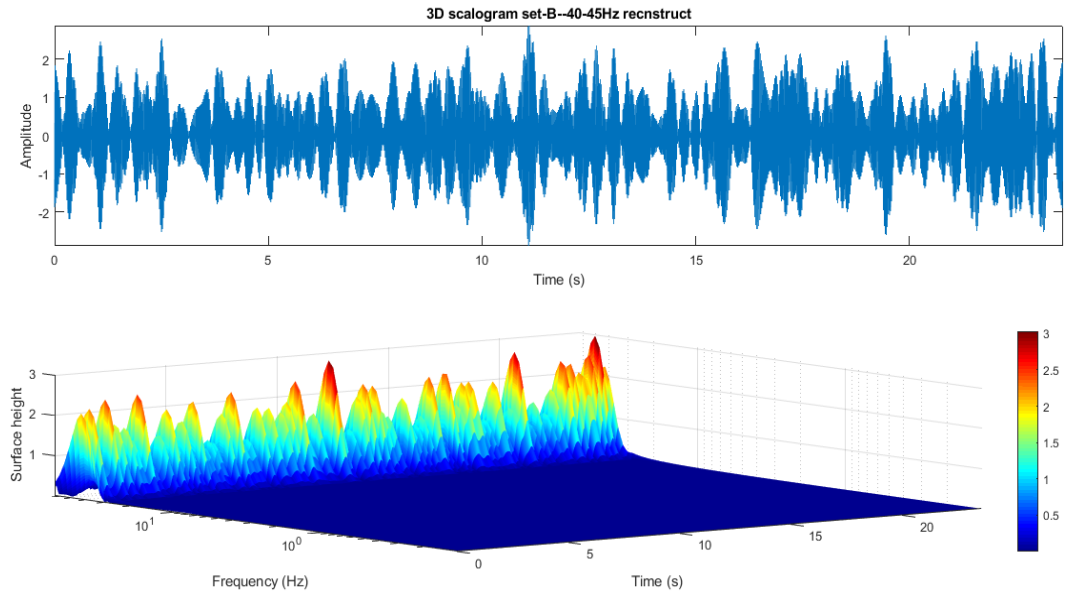

1  
2 Fig 4(c)- The 3D scalogram plot along with the reconstructed signal for the 40-45Hz region of the healthy subject  
3 eye open showing consistent peak power in the time scale. The reconstructed signal in the first subplot for the 40-  
4 45Hz region looks to be higher resonance in comparison to the patient during seizure where both resemble a music  
5 pattern.  
6  
7

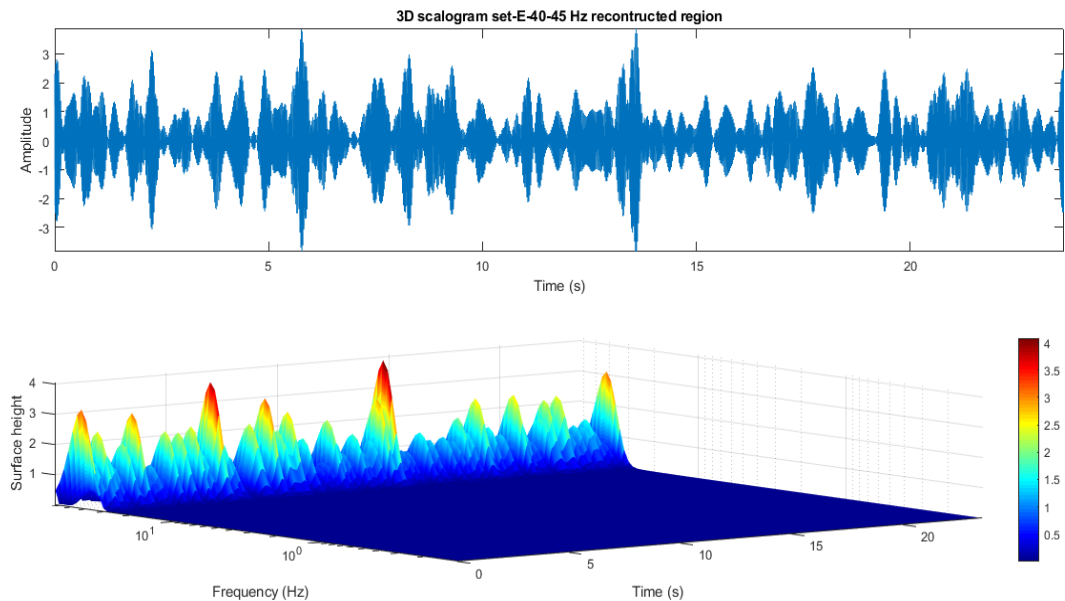

8  
9 Fig 4(d)- The 3D scalogram plot along with the reconstructed signal for the 40-45Hz region of the patient during  
10 seizure showing occasional peak power in the time scale. The possible energy transfer phenomena as  
11 transition from conscious to unconscious brain characteristic during seizure is prominent. The reconstructed signal  
12 for the 40-45Hz region in the first subplot resembles music patterns with less power in resonance as compared to Fig  
13 4c.  
14  
15

1 **Fig 4:** 3D plot of the scalogram along with the reconstructed signal for the UPO and 40-45Hz  
2 region of the Sets B and E.

3  
4 As we observed bi-stability in phase-space, in our regions of interest, 8-14Hz and 40-45Hz having  
5 higher order harmonics in the phase space, along with transient phenomena, we need to study the  
6 local properties for this region. To ascertain the time-frequency localization, we use wavelet  
7 analysis which reveals temporal behavior for those frequency regions of interest in the data. One  
8 clearly observes bimodal patterns in the scalogram plots. The 2D and 3D scalograms along with  
9 the reconstructed signal for both UPO and 40-45Hz region as shown in Fig 3 and 4 demonstrate  
10 the characteristic difference of scalogram power and reconstructed signal pattern for seizure  
11 compared to healthy. To further analyze the dynamics of this UPO region, we have taken the  
12 reconstructed time series data from the FPS where except the UPO region we have removed other  
13 frequency ranges of Fourier power and reconstructed using inverse Fourier transform. This  
14 reconstructed time series obtained from the inverse Fourier transform is used for phase space  
15 analysis to understand the dynamical behavior of UPO observed in the analyzed EEG signals.  
16 Hence, the phase space diagram emphasizes dynamical activity of the given time-series data.  
17 Similarly, we have also studied the phase space structure of the reconstructed signal for the 40-  
18 45Hz region.

19

## 20 UPO Region phase space plots:

21

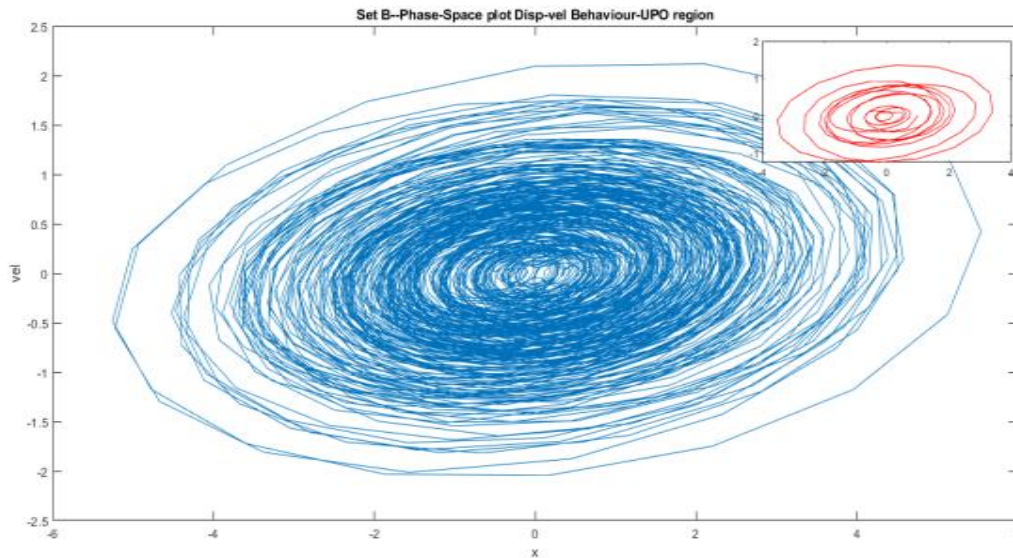

22  
23 Fig 5(a)- Phase space plot of healthy subject eye closed (set B) recorded EEG potential as displacement and its  
24 corresponding change as the velocity coordinate showing a centrally periodic motion with multi-periodic nature  
25 through closed loops.

26

27



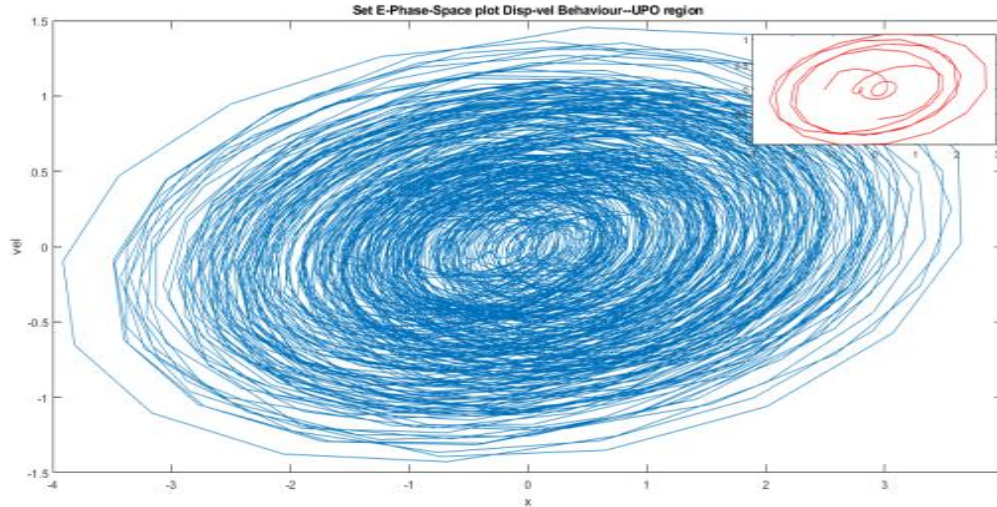

1  
2 Fig 5(b): Phase space plot of the patient during seizure (set E) displaying a more uniformly spread plot with bimodal  
3 structure in the middle where manifested periodic motion in the middle gradually transitioning to unbound motion.  
4

5 **Fig 5: UPO region displacement-velocity phase space plot**

6  
7 Further, to characterize these obtained phase structures for the UPO regions of set B and E, we  
8 used recently developed data driven discovery of governing physical laws using SINDy approach  
9 to derive the system equation for this phase space structure of the UPO. For the analysis, we  
10 considered  $x_0$  as the data from displacement coordinate while  $x_1$  is the data from velocity  
11 coordinate.  $\dot{x}_0$  and  $\dot{x}_1$  are the derivative of  $x_0$  and  $x_1$  respectively used to express the system  
12 equations. To correlate with harmonic oscillator motion, we have considered Fourier library with  
13 frequency order up to 3 and threshold 0.001 to compute the governing system equations for the set  
14 B UPO region phase space structure as shown below:

15  
16 
$$\dot{x}_0 = -19.092 \sin(x_0) - 0.515 \cos(x_0) + 288.882 \sin(x_1) - 0.007 \cos(x_1) + 4.507 \sin(2 x_0) + 0.886$$
  
17 
$$\cos(2 x_0) - 85.188 \sin(2 x_1) + 0.512 \cos(2 x_1) - 0.739 \sin(3 x_0) - 1.061 \cos(3 x_0) + 18.601 \sin(3 x_1)$$
  
18 
$$- 0.381 \cos(3 x_1) \dots(12)$$

19  
20 
$$\dot{x}_1 = -38.261 \sin(x_0) - 1.053 \cos(x_0) + 10.064 \sin(x_1) + 0.322 \cos(x_1) + 9.018 \sin(2 x_0) + 1.785$$
  
21 
$$\cos(2 x_0) - 4.101 \sin(2 x_1) + 0.303 \cos(2 x_1) - 1.433 \sin(3 x_0) - 2.208 \cos(3 x_0) + 1.944 \sin(3 x_1) -$$
  
22 
$$0.298 \cos(3 x_1) \dots(13)$$

23  
24 Similarly, for set E UPO, the derived governing system equation in Fourier domain is:

25  
26 
$$\dot{x}_0 = -25.679 \sin(x_0) - 0.688 \cos(x_0) + 276.953 \sin(x_1) - 0.773 \cos(x_1) + 10.221 \sin(2 x_0) + 0.558$$
  
27 
$$\cos(2 x_0) - 67.870 \sin(2 x_1) + 2.767 \cos(2 x_1) - 4.294 \sin(3 x_0) - 0.362 \cos(3 x_0) + 9.863 \sin(3 x_1)$$
  
28 
$$- 1.889 \cos(3 x_1) \dots(14)$$

29

$$\begin{aligned} \dot{x}_1 = & -51.329 \sin(x_0) - 1.383 \cos(x_0) + 23.217 \sin(x_1) - 1.593 \cos(x_1) + 20.453 \sin(2 x_0) + 1.185 \\ & \cos(2 x_0) - 7.793 \sin(2 x_1) + 5.650 \cos(2 x_1) - 8.629 \sin(3 x_0) - 0.838 \cos(3 x_0) + 0.684 \sin(3 x_1) - \\ & 3.853 \cos(3 x_1) \dots(15) \end{aligned}$$

In Fig 5, it is observed that the 8-14Hz UPO region for both the subjects shows simple harmonic motion, thus following Hooke's law as shown in equation (1), it then gradually changes to non-linear motion. The nonlinear motions generally exhibit quite complicated action over an extended time interval, like chaos. Sometimes under restricted conditions, linear differential equations appear as the approximations to nonlinear equations. The plots are also depicting bimodal behavior; thus, they have two stable shapes, and the multiple trajectories are orbiting around it in periodic motion and also showing unbounded motion like that of an Impact oscillator [53]. On comparing the two sets it has been observed that the bi-stability is stronger for the patient during seizure than that of the healthy subject in stable state. It is well known that the low dimensional chaos is a characteristic of many physiological oscillatory systems including the brain. Time series EEG data in a stable state has been analyzed in a frame of nonlinear dynamics like the attractor dimension. UPO here reveals its efficacy as a faithful biomarker for seizure state with its diminishing power. On careful observation, these plots show similarity to the well-known 'Lissajous' figures [52]. In Set E ictal period recordings where data is collected from a depth electrode, it is observed to possess a higher contribution of potential energy, manifesting through a denser plot and the bimodal or the bi-stability gets stronger in comparison to the healthy subject. In the plots the central dense region shows the simple harmonic behavior of the concentric ellipses; they then gradually transition to non-linear unbound type of motion similar to the impact oscillator. An impact oscillator is a periodically forced system that hits an obstruction whenever the displacement reaches a threshold value and a number of continuous impacts originate when the maximum displacement value of regular oscillatory motion equals this value, such events are known as grazing bifurcation [15]. In the phase-space plots it could be observed that the displacement-velocity and velocity-acceleration plots as shown in supplementary material of this manuscript also shows similar kind of behavior as we know that of the harmonic equation.

$$\begin{aligned} x &= A \sin \omega t \\ \dot{x} &= A \omega \cos t \quad \dots(16) \\ \ddot{x} &= A \omega^2 \sin \omega t \end{aligned}$$

The derived governing system equations in Fourier form from the data for these UPO region phase space structures of both subjects show similar harmonic oscillator system description as in equation 16. Thus, in the displacement-velocity behavior we are getting the relation between sine and cosine terms, hence resembling these plots. The higher order terms in sine and cosine functions in the obtained governing system equation points to the nonlinearity present in both UPO and 40-45Hz, instead of a simple harmonic oscillator. The nonlinearity brings in anharmonicity to the simple damped driven oscillators leading to bi-stability, higher harmonic generation and limit cycle behavior [9, 54]. It is worth emphasizing that we observe the characteristic impact oscillator behavior, when a grazing mechanism leads a non impacting periodic orbit to bifurcate into the

1 impacting one [16]. Like the duffing oscillator the outer orbits tend to return back to the origin  
2 which is again matching with the nonlinear nature of the impact oscillator. These faithful  
3 reproductions of physical behavior from the EEG UPO region analysis confirm the previous  
4 observations and its use as biomarker for medical usages.

5 **40-45Hz region phase space plots:-**

6

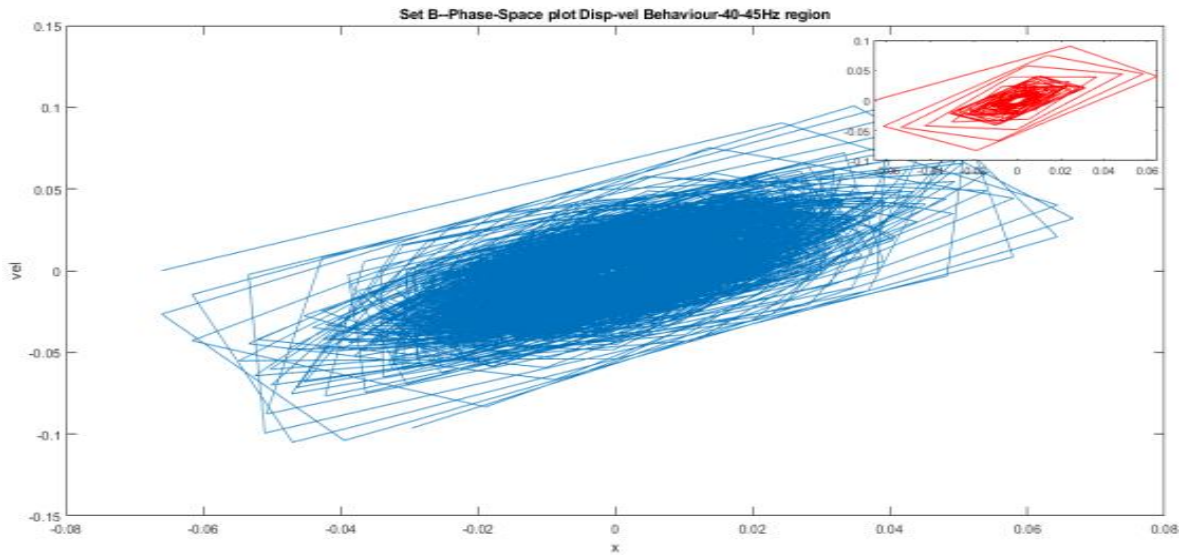

7

8

9 Fig 6(a): For Set B 40-45 region, in the central region the trajectories paths are following a simple harmonic motion  
10 but with increase of the distance from the center, the lines are following a nonlinear type of motion with velocity  
11 values suddenly increasing in the outermost orbits.

12

13

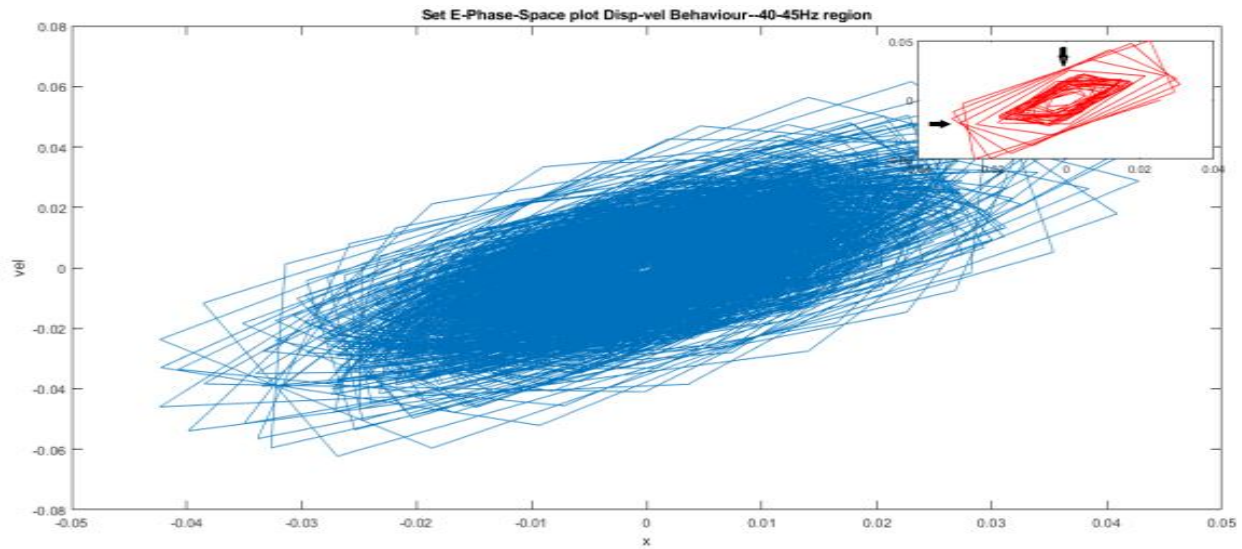

14

15

16 Fig 6(b): For Set E 40-45Hz region, here the central region is also following linear motion and at the outer part it is  
17 following a piecewise linear motion with grazing bifurcation. The acceleration values are increasing sharply, depicting

1 an-harmonic oscillator behavior of the patient during seizure.

2

3 **Fig 6: 40-45Hz region phase space displacement-velocity plot**

4

5 Similarly, with use of SINDy model for set B 40-45Hz region reconstructed data and the derived  
6 governing system equation in Fourier domain is:

7

8  $\dot{x}_0 = -3131511.935 \sin(x_0) + 82443769.956 \cos(x_0) + 678523.429 \sin(x_1) - 82419440.425 \cos(x_1)$   
9  $+ 2504706.443 \sin(2 x_0) - 33070180.875 \cos(2 x_0) - 542505.362 \sin(2 x_1) + 33031264.301 \cos(2$   
10  $x_1) - 626022.264 \sin(3 x_0) + 5537454.129 \cos(3 x_0) + 135553.385 \sin(3 x_1) - 5522867.096 \cos(3$   
11  $x_1) \dots(17)$

12

13  $\dot{x}_1 = -12797384.692 \sin(x_0) + 90183271.512 \cos(x_0) + 611409.417 \sin(x_1) - 90118381.247 \cos(x_1)$   
14  $+ 10240767.826 \sin(2 x_0) - 36214221.929 \cos(2 x_0) - 489091.283 \sin(2 x_1) + 36110384.091 \cos(2$   
15  $x_1) - 2561495.102 \sin(3 x_0) + 6074872.937 \cos(3 x_0) + 122313.224 \sin(3 x_1) - 6035925.366 \cos(3$   
16  $x_1) \dots(18)$

17

18 Whereas system equation for set E 40-45Hz region phase space structure is:

19

20  $\dot{x}_0 = 5458601.938 \sin(x_0) - 631503369.401 \cos(x_0) - 162423.019 \sin(x_1) + 631553510.817 \cos(x_1)$   
21  $- 4368384.335 \sin(2 x_0) + 252662524.133 \cos(2 x_0) + 130773.093 \sin(2 x_1) - 252742777.688 \cos(2$   
22  $x_1) + 1092667.639 \sin(3 x_0) - 42127410.859 \cos(3 x_0) - 32983.353 \sin(3 x_1) + 42157523.001 \cos(3$   
23  $x_1) \dots(19)$

24

25  $\dot{x}_1 = 18209445.067 \sin(x_0) - 61662109.203 \cos(x_0) - 281217.774 \sin(x_1) + 61703060.635 \cos(x_1)$   
26  $- 14572039.226 \sin(2 x_0) + 24621484.214 \cos(2 x_0) + 225628.488 \sin(2 x_1) - 24687036.534 \cos(2$   
27  $x_1) + 3644768.817 \sin(3 x_0) - 4091512.643 \cos(3 x_0) - 56625.125 \sin(3 x_1) + 4116113.532 \cos(3$   
28  $x_1) \dots(20)$

29

30 From the above 40-45Hz phase space plots as in Fig 6, it can be concluded the occurrence of the  
31 energy transfer phenomenon [19] with conservation of energy states here. In this 40-45 Hz region  
32 the coherence phenomenon gets more intense and in case of the epileptic patient plot (epileptogenic  
33 zone and during seizure) the potential energy is seen to be more dominant (thus the kinetic energy  
34 decrease) than in the case of the healthy subjects. The velocity, acceleration plots for the 40-45Hz  
35 region are shown in the supplementary material section of this manuscript where near the central  
36 region it separates out the lower value voltages compared to the higher value voltage. The small  
37 oscillations are having linear motion, but the large oscillations are tending to acquire an unbound  
38 kind of motion like an impact oscillator.

39

40 In Fig 6(b), it is seen that the inset figure of 100 data points with the marked black arrows show  
41 where acceleration or the velocity values are zero, clearly revealing that the region possesses

1 minimum kinetic region as well as the maximum potential energy. If we observe over the plot the  
 2 crowd in those points are clearly visible whereas in the inset figure it is only showing the emerging  
 3 feature which itself has great importance in this analysis, because it shows the local coordinates  
 4  $(x, \dot{x}, \ddot{x})$  characteristically similar behavior as of the plot which is not possible in case of wave  
 5 features (with sine and cosine). Thus, we could also consider this energy transition phenomena at  
 6 40-45Hz section as a biomarker for the onset of the epileptic seizure. From the plots it is confirmed  
 7 that a small perturbation in the potential value results into a significant variation in the  
 8 corresponding velocities, or its rate of change in a piecewise linear motion in the extreme orbits  
 9 which is indicative of grazing impact oscillator type dynamical characteristics, of non-linearity. It  
 10 is also seen, if we consider the plots for Set E and Set D (the intracranial epileptogenic zone  
 11 recordings for the patient shown in supplementary material section) it is observed that the plots for  
 12 these two sets shows similar behavior in the sense of the path, trajectories but the contribution of  
 13 potential energy is higher in Set D, which results in a similar structure as each other, which is  
 14 quite expected because both are from the patient during ictal and inter- ictal period. Other phase  
 15 space plots for the datasets are given in the supplementary material of the manuscript.  
 16

| Sl.No. | Set Name | Region   | Var.        | Amplitudes (Coefficients) |                      |                       |                       |                       |                       |
|--------|----------|----------|-------------|---------------------------|----------------------|-----------------------|-----------------------|-----------------------|-----------------------|
|        |          |          |             | Sin(x <sub>0</sub> )      | Sin(x <sub>1</sub> ) | Sin(2x <sub>0</sub> ) | Sin(2x <sub>1</sub> ) | Sin(3x <sub>0</sub> ) | Sin(3x <sub>1</sub> ) |
| 1.     | Set-B    | UPO      | $\dot{x}_0$ | -19.092                   | 288.882              | 4.507                 | -85.188               | -0.739                | 18.601                |
|        |          |          | $\dot{x}_1$ | -38.261                   | 10.064               | 9.018                 | -4.010                | -1.433                | 1.944                 |
|        |          | 40-45 Hz | $\dot{x}_0$ | -3131511.935              | 678523.429           | 2504706.443           | -542505.362           | -626022.264           | 135553.385            |
|        |          |          | $\dot{x}_1$ | -12797384.692             | 611409.417           | 1240767.826           | -489091.283           | -2561495.102          | 122313.224            |
| 2.     | Set-E    | UPO      | $\dot{x}_0$ | -25.679                   | 276.953              | 10.221                | -67.870               | -4.294                | 9.863                 |
|        |          |          | $x_1$       | -51.329                   | 23.217               | 20.453                | -7.793                | -8.629                | 0.684                 |
|        |          | 40-45 Hz | $\dot{x}_0$ | 5458601.938               | -162423.019          | -4368384.335          | 130773.093            | 1092667.639           | -32983.353            |
|        |          |          | $x_1$       | 18209445.067              | -281217.774          | 14572039.226          | 225628.488            | 3644768.817           | -56625.125            |

17  
 18 **Table 3:** Amplitude of the coefficients of all sine terms in the governing system equations of both  
 19 UPO and 40-45Hz region for healthy and patients. Sine amplitudes of  $x_1$  are found to be higher

1 than  $x_0$  and the 40-45Hz amplitudes are higher compared to UPO amplitude.  
2

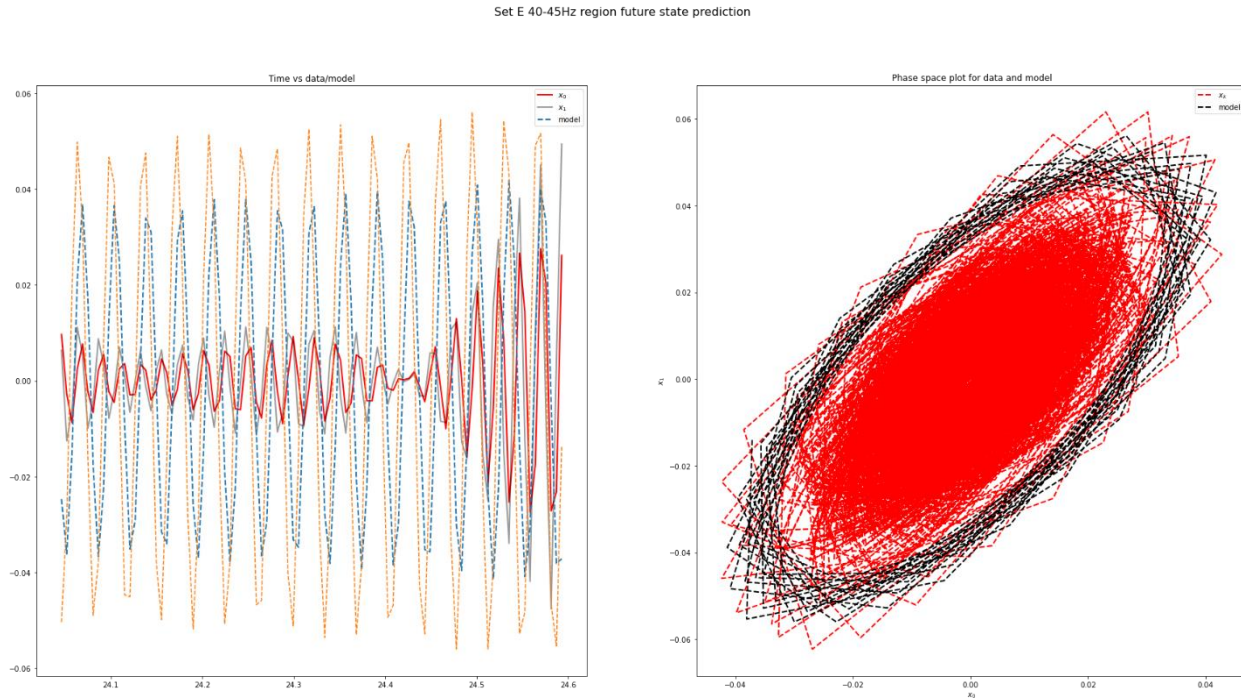

3  
4 **Fig 7:** Plot of displacement-velocity phase space data along with the model data for set E(patient  
5 during seizure) 40-45Hz region. We observe the derived governing equation/model matches to the  
6 phase space displacement-velocity data in the first subplot where x-axis is time, and in the second  
7 subplot phase space is drawn for data and the model that enables future phase space trajectory state  
8 prediction. Other plots for set B for 40-45Hz and UPO region are shown in the supplementary  
9 material of the manuscript.

10  
11 Hence the phase space dynamics help as a bio-alarm for the seizure in epileptic patient. Our derived  
12 governing system equation for 40-45Hz from the phase space data complements the analysis. In  
13 Table 3, we show the coefficient amplitudes of all sine terms from the governing system equations  
14 to give a comparative view of the nonlinearity terms and it's spread for the UPO and 40-45Hz  
15 region. From the equation in table 3, we observe the higher order sine term has lesser amplitude  
16 as compared to lower order one relating to the higher order nonlinear phenomena existence. We  
17 observe such nonlinear phenomena by the weaker presence of higher order sinusoidal terms for  
18 the UPO region, as compared to the 40-45Hz range, which points to the high order nonlinearity at  
19 40-45Hz relating energy transfer phenomena from conscious to unconscious brain state. Also, it is  
20 observed that Set B 40-45Hz higher order sine terms mostly have lower amplitude, as compared  
21 to Set E which points to the nonlinearity of higher order in patients during seizure compared to  
22 healthy subjects. We also observe from the equations that the sine term amplitudes are generally  
23 higher than that of the cosine terms for the UPO region, whereas the cosine terms have higher  
24 magnitude for the 40-45Hz region compared to sine terms. This corroborates the energy transfer  
25 phenomenon occurring in the 40-45Hz region as it is observed to be having higher coherence

1 phenomena where the brain state transitions from the conscious to the unconscious state. In Fig.  
2 7, we show the derived governing system equation for the reconstructed signal used in phase space  
3 orbit closely matches with the data. The derived governing equations could be used to predict the  
4 future state of the system hence enables here prediction of the future phase space trajectory  
5 evolution at UPO and 40-45Hz region that allows easy identification of change in  
6 physical/biological phenomenon in these regions.

7

## 8 **4. Inference**

9

10 The Fourier power spectrum analysis to identify the UPO region and further its reconstructed  
11 signal from inverse Fourier transform to use in the phase-space analysis for different subject EEG  
12 recordings of the brain can be used for finding the biosignature on the onset of epileptic seizure.  
13 As brain signals are from a nonlinear dynamical system whose behavior is complex hence it is  
14 highly effective for the analysis of epilepsy. The bi-stability in the plots show nonlinear behavior  
15 of the data. Fourier spectral analysis method allow us to separate the UPO domain precisely in  
16 phase space perspective. Together with a data driven approach, the governing system equations  
17 were derived to corroborate the understanding of nonlinearity observed from the phase space orbits  
18 which also allows future state prediction of phase space trajectory for UPO and 40-45Hz region.  
19 The Newtonian mechanics approach in terms of potential and kinetic energy difference and  
20 differing grazing orbits often possess piecewise linear motion. For the case of the brain signals we  
21 observe impact oscillator type behavior and symmetries in phase space, originating from  
22 coalescing of the orbits. The observed coherence and higher order nonlinearity at 40-45Hz region  
23 corroborates the understanding of energy transfer phenomena and effectively the brain state  
24 transition from conscious to unconscious state with characteristic difference between healthy and  
25 seizure. The time-frequency localization using wavelet analysis to understand the transient  
26 phenomena at these region of interest 8-14Hz and 40-45Hz shows bimodal patterns with distinct  
27 behavior for healthy and seizure. Potentially, 40-45Hz could also be used as biomarker for seizure  
28 and we wish to focus our study on future. As epilepsy is a serious disease affecting a considerable  
29 amount of the global population hence these investigations may find its significance in  
30 biomedicine.

31

## 32 **Appendix A. Supplementary material**

33 Supplementary material to this article can be found with this manuscript.

34

## 35 **Acknowledgements**

36 This research work did not receive any specific grant from funding agencies in the public,  
37 commercial, or not-for-profit sectors. The author MPal wishes to thank ABB Ability Innovation  
38 Center, Hyderabad for their support in research work. The authors alone are responsible for the  
39 content and writing of the paper.

40

## References

1. J. Gao, J. Hu, W.-w Tung, Complexity measures of brain wave dynamics. *Cognitive Neurodynamics* 5, 171–182 (2011).
2. H. Korn, P. Faure, Is there chaos in the brain? II. Experimental evidence and related models. *C. R. Biologies* 326, 787–840 (2003).
3. C. E. Stafstrom, L. Carmant, Seizures and epilepsy: an overview for neuroscientists, *Cold Spring Harb Perspect Med.* 1, 5(6):a022426 (2015). DOI: 10.1101/cshperspect.a022426.
4. V. K. Jirsa, W. C. Stacey, P. P. Quilichini, A. I. Ivanov, C. Bernard, On the nature of seizure dynamics. *Brain* 137, 2210–2230 (2014).
5. F. H. Lopes Da Silva , W. Blanes , S. N. Kalitzin , J. Parra , P. Suffczynski , D. N. Velis, Epilepsies as dynamical diseases of brain systems: basic models of the transition between normal and epileptic activity. *Epilepsia* 44, 72–83 (2003).
6. N. Kannathal, J. Chee, E. R. Kenneth, K. Lim, O. H. Tat, Chaotic Analysis of Epileptic EEG Signals, In: Goh J. (eds) *The 15th International Conference on Biomedical Engineering*. IFMBE Proceedings (43) Springer, Cham (2014). DOI: 10.1007/978-3-319-02913-9\_166.
7. K. Lehnertz, C.E. Elger, Spatio-temporal dynamics of the primary epileptogenic area in temporal lobe epilepsy characterized by neuronal complexity loss, *Electroencephalography and Clinical Neurophysiology* 95 (2) 108-117 (1995).
8. L. D. Iasemidis, H. P. Zaveri, J. C. Sackellares , W. J. Williams, Phase space analysis of EEG in temporal lobe epilepsy. *Conf Proc IEEE Eng Med Biol Soc.* Nov 4–7, New Orleans, LA , USA (1988).
9. F. L. da Silva, W. Blanes, S. N. Kalitzin et al., Epilepsies as Dynamical Diseases of Brain Systems: Basic Models of the Transition Between Normal and Epileptic Activity, *Epilepsia* 44 (Suppl. 12) 72–83 (2003). DOI: 10.1111/j.0013-9580.2003.12005.
10. P. J. Franaszczuk, K. J. Blinowska, Linear Model of Brain Electrical Activity - EEG as a Superposition of Damped Oscillatory Modes. *Biol. Cybern.* 53, 19-25 (1985).
11. J. Martinerie, C. Adam, M. L. V. Quyen, M. Baulac, S. Clemenceau, B. Renault, F. Varela, Epileptic seizures can be anticipated by non-linear analysis. *Nat Med* 4, 1173–1176 (1998).
12. A . Babloyantz , A . Destexhe , Low-dimensional chaos in an instance of epilepsy. *Proc. Natl. Acad. Sci. USA* 83 (10) 3513–3517 (1986).
13. J. J. Wright, D. T. J. Liley, Dynamics of the brain at global and microscopic scales: Neural networks and the EEG. *Behavioral and Brain Sciences* 19, 285-320 (1996).
14. R. C. Watt, S. R. Hameroff, Phase space electroencephalography (EEG): A new mode of intraoperative EEG analysis, *Int. J. Clin. Monit. Comput.* 5 (1) 3–13 (1988).
15. N. Pradhan, P. K. Sadasivan, S. Chatterji, D. Narayana Dutt, Patterns of Attractor dimensions of Sleep EEG. *Comput. Biol. Med.* 25 (5) 455-462 (1995).



- 1 16. T. F. Collura, H. H. Morris, R. C. Burgess, E. C. Jacobs, G. H. Klem, Phase-plane  
2 trajectories of EEG seizure patterns in epilepsy, *AM. J. EEG Technol.* 32(4) 295-307  
3 (1992).
- 4 17. M. B. MacIver, B. H. Bland, Chaos analysis of EEG during isoflurane-induced loss of  
5 righting in rats, *Frontiers in Systems Neuroscience* 8 (203) 1-8 (2014). DOI:  
6 10.3389/fnsys.2014.00203
- 7 18. E. Urrestarazu, R. Chander, F. Dubeau, J. Gotman, Interictal high-frequency oscillations  
8 (100 -500 Hz) in the intracerebral EEG of epileptic patients, *Brain* 130, 2354-2366 (2007).
- 9 19. M. Pal, Neeraj, P. K. Panigrahi, Evidence of coupled oscillator to wave packet dynamics  
10 in human brain, DOI: 10.21203/rs.3.rs-86186/v2.
- 11 20. E. Olbrich, P. Achermann, Analysis of oscillatory patterns in the human sleep EEG using  
12 a novel detection algorithm, *J. Sleep Res.* 14 (4) 337–346 (2005).
- 13 21. T Zhang, W Chen, M Li, AR based quadratic feature extraction automated in the VMD  
14 domain for the seizure detection of EEG using random forest classifier, *Biomedical Signal*  
15 *Processing and Control* 31, 550–559 (2017).
- 16 22. T. Gandhi, B. K. Panigrahi, S. Ananda, A comparative study of wavelet families for EEG  
17 signal classification, *Neurocomputing* 74 (17) 3051-3057 (2011).
- 18 23. M. Pal, P. Manimaran, P. K. Panigrahi, A multi scale time-frequency view of epilepsy from  
19 human EEG signals reveals characteristic features of seizure,  
20 [doi.org/10.13140/RG.2.2.33045.55524](https://doi.org/10.13140/RG.2.2.33045.55524)
- 21 24. H. U. Amin, A.S. Malik, R. F. Ahmad et al., Feature extraction and classification for EEG  
22 signals using wavelet transform and machine learning techniques. *Australas Phys Eng Sci*  
23 *Med* 38, 139–149 (2015). DOI: 10.1007/s13246-015-0333-x
- 24 25. Hasan Ocak, Automatic detection of epileptic seizures in EEG using discrete wavelet  
25 transform and approximate entropy, *Expert Systems with Applications* 36 (2) 1, 2027-2036  
26 (2009). DOI: 10.1016/j.eswa.2007.12.065.
- 27 26. M. Pal, P. M. Rao, EEG Epilepsy Seizure Signal Characterization through theories of  
28 Random Matrix Analysis. 8th International Conference on Latest Trends in Engineering  
29 and Technology (ICLTET'2016) May 5-6 2016 Dubai (UAE), ISBN : 978-93-84422-65-3  
30 (2016).
- 31 27. A. Accardo, M. Affinito, M. Carrozzi, F. Bouquet, Use of the fractal dimension for the  
32 analysis of electroencephalographic time series, *Biol Cybern* 77(5) 339-350 (1997). DOI:  
33 10.1007/s004220050394
- 34 28. S. Dutta, D. Ghosh, S. Samanta, S. Dey, Multifractal parameters as an indication of  
35 different physiological and pathological states of the human brain, *Physica A* 396, 155-163  
36 (2014).
- 37 29. R. Uthayakumar, D. Easwaramoorthy, Epileptic seizure detection in EEG signals using  
38 multifractal analysis and wavelet transform, *Fractals* 21 (02) 1350011 (2013).

- 1 30. V. Srinivasan, C. Eswaran, N. Sriraam, Approximate Entropy-Based Epileptic EEG  
2 Detection Using Artificial Neural Networks, *IEEE Transactions on Information*  
3 *Technology in Biomedicine* 11(3) 288-295 (2007). DOI: 10.1109/TITB.2006.884369.
- 4 31. N. F. Güler, E. D. Übeyli, I. Güler, Recurrent neural networks employing Lyapunov  
5 exponents for EEG signals classification, *Expert Syst. Appl.* 29 (3) 506-514 (2005).
- 6 32. E. D. Übeyli, Lyapunov exponents/probabilistic neural networks for analysis of EEG  
7 signals, *Expert Syst. Appl.* 37 (2) 985-992 (2010).
- 8 33. R Sharma, R B Pachori, P Sircar, Seizures classification based on higher order statistics  
9 and deep, neural network, *Biomedical Signal Processing and Control* 59, 101921 (2020).
- 10 34. J. H. Hannay, A. M. O. de Almeida, Periodic orbits and a correlation function for the  
11 semiclassical density of states. *J. Phys. A* 17, 3429 (1984).
- 12 35. E. Heller, Bound-State Eigenfunctions of Classically Chaotic Hamiltonian Systems: Scars  
13 of Periodic Orbits. *Phys. Rev. Lett.* 53, 1515 (1984).
- 14 36. M. S. Santhanam, J. N. Bandyopadhyay, Spectral Fluctuations and 1/f Noise in the Order-  
15 Chaos Transition Regime. *Phys. Rev. Lett.* 95, 114101 (2005).
- 16 37. F. Haake, *Quantum Signatures of Chaos*. (Springer-Verlag, Berlin, 2000), 2nd ed.
- 17 38. M. V. Berry, Uniform asymptotic smoothing of Stokes's discontinuities. *Proc. R. Soc. A*  
18 422, 7 (1989).
- 19 39. R. G. Andrzejak, K. Lehnertz, F. Mormann, C. Rieke, P. David, C. E. Elger, Indications of  
20 nonlinear deterministic and finite-dimensional structures in time series of brain electrical  
21 activity: Dependence on recording region and brain state. *Phys Rev E* 64, 061907 (2001).
- 22 40. H. Chu, C. K. Chung, W. Jeong, K.-H. Cho, Predicting epileptic seizures from scalp EEG  
23 based on attractor state analysis, *Computer Methods and Programs in Biomedicine* 143,  
24 75–87 (2017).
- 25 41. D. J. W. Simpson, V. Avrutin, S. Banerjee, Nordmark map and the problem of large-  
26 amplitude chaos in impact oscillators, *Phys Rev E* 102(2-1) 022211 (2020). DOI:  
27 10.1103/PhysRevE.102.022211.
- 28 42. R. Tibshirani, Regression shrinkage and selection via the lasso, *J R Stat Soc, B* 58 (1) 267–  
29 288 (1996).
- 30 43. T. Hastie, R. Tibshirani, J. Friedman, *The Elements of Statistical Learning*, Springer, New  
31 York 2 (2009).
- 32 44. G. James, D. Witten, T. Hastie, R. Tibshirani, *An Introduction to Statistical Learning*,  
33 Springer, New York (2013).
- 34 45. D. L. Donoho, Compressed sensing, *IEEE Trans Inf Theory* 52 (4) 1289–1306 (2006).
- 35 46. E. J. Candès, J. Romberg, T. Tao, Robust uncertainty principles: Exact signal  
36 reconstruction from highly incomplete frequency information, *IEEE Trans Inf Theory* 52  
37 (2) 489–509 (2006).
- 38 47. E. J. Candès, M. B. Wakin, An introduction to compressive sampling, *IEEE Signal*  
39 *Processing Magazine* 25 (2) 21–30 (2008).
- 40 48. R. G. Baraniuk, Compressive sensing, *IEEE Signal Process Mag* 24 (4) 118–120 (2007).

- 1 49. S. L. Brunton, J. L. Proctor, J. N. Kutz, Discovering governing equations from data by  
2 sparse identification of nonlinear dynamical systems, *PNAS* 113 (15) 3932–3937 (2016).
- 3 50. B. Lusch, J. N. Kutz, S. L. Brunton, Deep learning for universal linear embeddings of  
4 nonlinear dynamics, *Nature Communications* 9:4950 (2018).
- 5 51. K. Champion, B. Lusch, J. N. Kutz, S. L. Brunton, Data-driven discovery of coordinates  
6 and governing equations, *PNAS* 116 (45) 22445–22451 (2019).
- 7 52. P. Holmes, J. Guckenheimer, *Nonlinear oscillations, dynamical systems, and bifurcations*  
8 *of vector fields*, Applied Mathematical Sciences, Springer, Berlin, 42 (1983).
- 9 53. J. Ing, E. Pavlovskaia, M. Wiercigroch, S. Banerjee, Experimental study of impact  
10 oscillator with one-sided elastic constraint, *Philos. Trans. R. Soc. A Math. Phys. Eng. Sci.*  
11 366(1866) (2007).
- 12 54. H. Korn, P. Faure, Is there chaos in the brain? II. Experimental evidence and related  
13 models. *C. R. Biologies* 326, 787–840 (2003).
